# Supplementary material for: Ca2+-permeable mechanosensitive channels MCA1 and MCA2 mediate cold-induced cytosolic Ca2+ increase and cold tolerance in Arabidopsis
Source: PubMed Central journal article supplement (PMC5765038; doi:10.1038/s41598-017-17483-y), 2018-01-11
Supplement: 41598_2017_17483_MOESM1_ESM.pdf [file 41598_2017_17483_MOESM1_ESM.pdf]

## Supplementary Information for *Scientific Reports*

---

### **Ca<sup>2+</sup>-permeable mechanosensitive channels MCA1 and MCA2 mediate cold-induced cytosolic Ca<sup>2+</sup> increase and cold tolerance in Arabidopsis**

Kendo Mori<sup>1,§</sup>, Na Renhu<sup>2,§</sup>, Maho Naito<sup>1</sup>, Aki Nakamura<sup>1</sup>, Hayato Shiba<sup>2</sup>,  
Tsuyoshi Yamamoto<sup>2</sup>, Takuya Suzaki<sup>2</sup>, Hidetoshi Iida<sup>1,\*</sup>, Kenji Miura<sup>2,\*</sup>

<sup>2</sup>Department of Biology, Tokyo Gakugei University, 4-1-1 Nukui kita-machi, Koganei,  
Tokyo 184-8501, Japan

<sup>2</sup>Graduate School of Life and Environmental Sciences, University of Tsukuba, Tsukuba  
305-8572, Japan

<sup>§</sup>These authors contributed equally to this work.

\*Correspondence to email: [miura.kenji.ga@u.tsukuba.ac.jp](mailto:miura.kenji.ga@u.tsukuba.ac.jp) & [iida@u-gakutei.ac.jp](mailto:iida@u-gakutei.ac.jp)

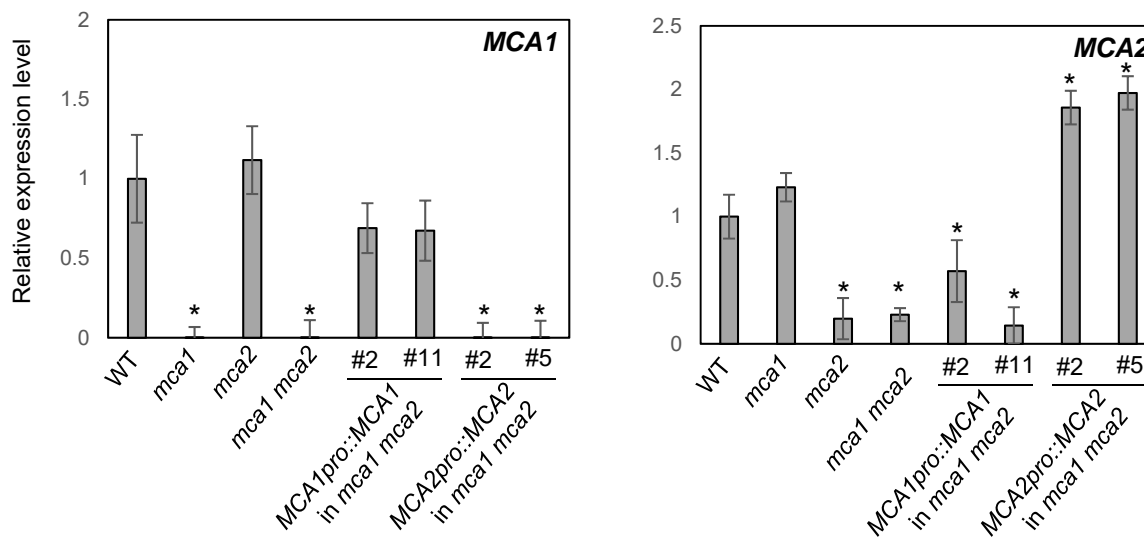

Figure S1. The levels of the *MCA1* and *MCA2* transcripts in the mutant and complement lines. Total RNA was purified from 8 plants grown for 14 days. Transcript levels of the *MCA1* and *MCA2* genes were measured by quantitative real-time PCR as described in Methods in the main text. Values represent the means  $\pm$  SD ( $n = 3$ ). An asterisk indicates a significant difference from wild-type plants as determined by unpaired Student's *t*-tests.
